# Supplementary material for: Global transcriptional analysis suggests Lasiodiplodia theobromae pathogenicity factors involved in modulation of grapevine defensive response
Source: PubMed Central journal article supplement (PMC4981995; doi:10.1186/s12864-016-2952-3), 2016-08-11
Supplement: 12864_2016_2952_MOESM3_ESM.pdf [file 12864_2016_2952_MOESM3_ESM.pdf]

# File\_S1 Global transcriptional analysis suggests *Lasiodiplodia theobromae* pathogenicity factors involved in modulation of grapevine defensive response

Marcos Paolinelli-Alfonso<sup>1</sup>, Jose Manuel Villalobos-Escobedo<sup>2</sup>, José Fabricio López-Hernández<sup>2</sup>, Clara Galindo-Sánchez<sup>3</sup>, Philippe Rolshausen<sup>4</sup>, Alfredo Heriberto Herrera-Estrella<sup>2</sup> and Rufina Hernández-Martínez<sup>1</sup>

<sup>1</sup>Centro de Investigación Científica y de Educación Superior de Ensenada. Departamento de Microbiología. Ensenada, Baja California, México. <sup>2</sup>Laboratorio Nacional de Genómica para la Biodiversidad (LANGEBIO). Centro de Investigación y de Estudios Avanzados del I. P. N. Irapuato, Guanajuato, México. <sup>3</sup> Centro de Investigación Científica y de Educación Superior de Ensenada. Departamento de Biotecnología. Ensenada, Baja California, México. <sup>4</sup>Department of Botany and Plant Sciences, University of California Riverside, Riverside, CA 92521, USA.

## RNA extraction from infected grapevine shoots

Total RNA from *L. theobromae*-infected grapevine was isolated using a cetyltrimethylammonium bromide (CTAB)-based extraction method (Gambino et al., 2008). Briefly, a day previous to RNA extraction, the transversal sections (around 5 mm of length and 100 mg of weight) of infected grapevines was removed from NAP solution and placed in 2.0 mL tubes, containing one ¼ inch ceramic bead and 50 mg of 0.5 mm and 100 mg of 1 mm glass beads (Biospec). Tubes were beaten on a Mini-Beadbeater (Biospec Products) for 30 s. Immediately, tubes were chilled on ice, and pre-heated lysis solution was added (2% v/v CTAB, 2% v/v PVP, Tris-HCl 100 mM pH 8.0, NaCl 2 M, EDTA 25 mM, and 2% of  $\beta$ -mercaptoethanol added just before use) before subjecting the tubes to a second beating cycle for 30 s. Lysed samples were incubated at 65 °C for 5 min and 500  $\mu$ l of CIA (24:1 v:v) was added and mixed twice in a Vortex. Tubes were centrifuged at 4,000 rpm for 30 min at 4 °C. The washing with CIA was repeated and then the aqueous phase was transferred to a new 1.5 mL tube and mixed with 1 v of 75% ethanol v:v. The total mix was passed through a silica column (Epochlab) and centrifuged at maximal velocity for 1 min at room temperature. Thereafter, the column was washed with RPE buffer (Qiagen) and twice with ethanol 75% v:v. Finally, total RNA was eluted in 48  $\mu$ L of nuclease-free water (Qiagen) by centrifugation at maximal velocity.

## References

- Reid K.E., N. Olsson, J. Schlosser, F. Peng and S.T. Lund, 2006. An optimized grapevine RNA isolation procedure and statistical determination of reference genes for real-time RT-PCR during berry development. *BMC Plant Biology* 6: 27.
- Vasanthaiah H.K.N., R. Katam and M.B. Sheikh, 2008. Efficient protocol for isolation of functional RNA from different grape tissue rich in polyphenols and polysaccharides for gene expression studies. *Electronic Journal of Biotechnology* 11: 1-9
- Gambino, G., Perrone, I., and I. Gribaudo, 2008. A Rapid and effective method for RNA extraction from different tissues of grapevine and other woody plants. *Phytochemical Analysis : PCA*, 19(6), 520–5. doi:10.1002/pca.1078
