# Supplementary material for: Global transcriptional analysis suggests Lasiodiplodia theobromae pathogenicity factors involved in modulation of grapevine defensive response
Source: PubMed Central journal article supplement (PMC4981995; doi:10.1186/s12864-016-2952-3), 2016-08-11

# UP-REGULATED

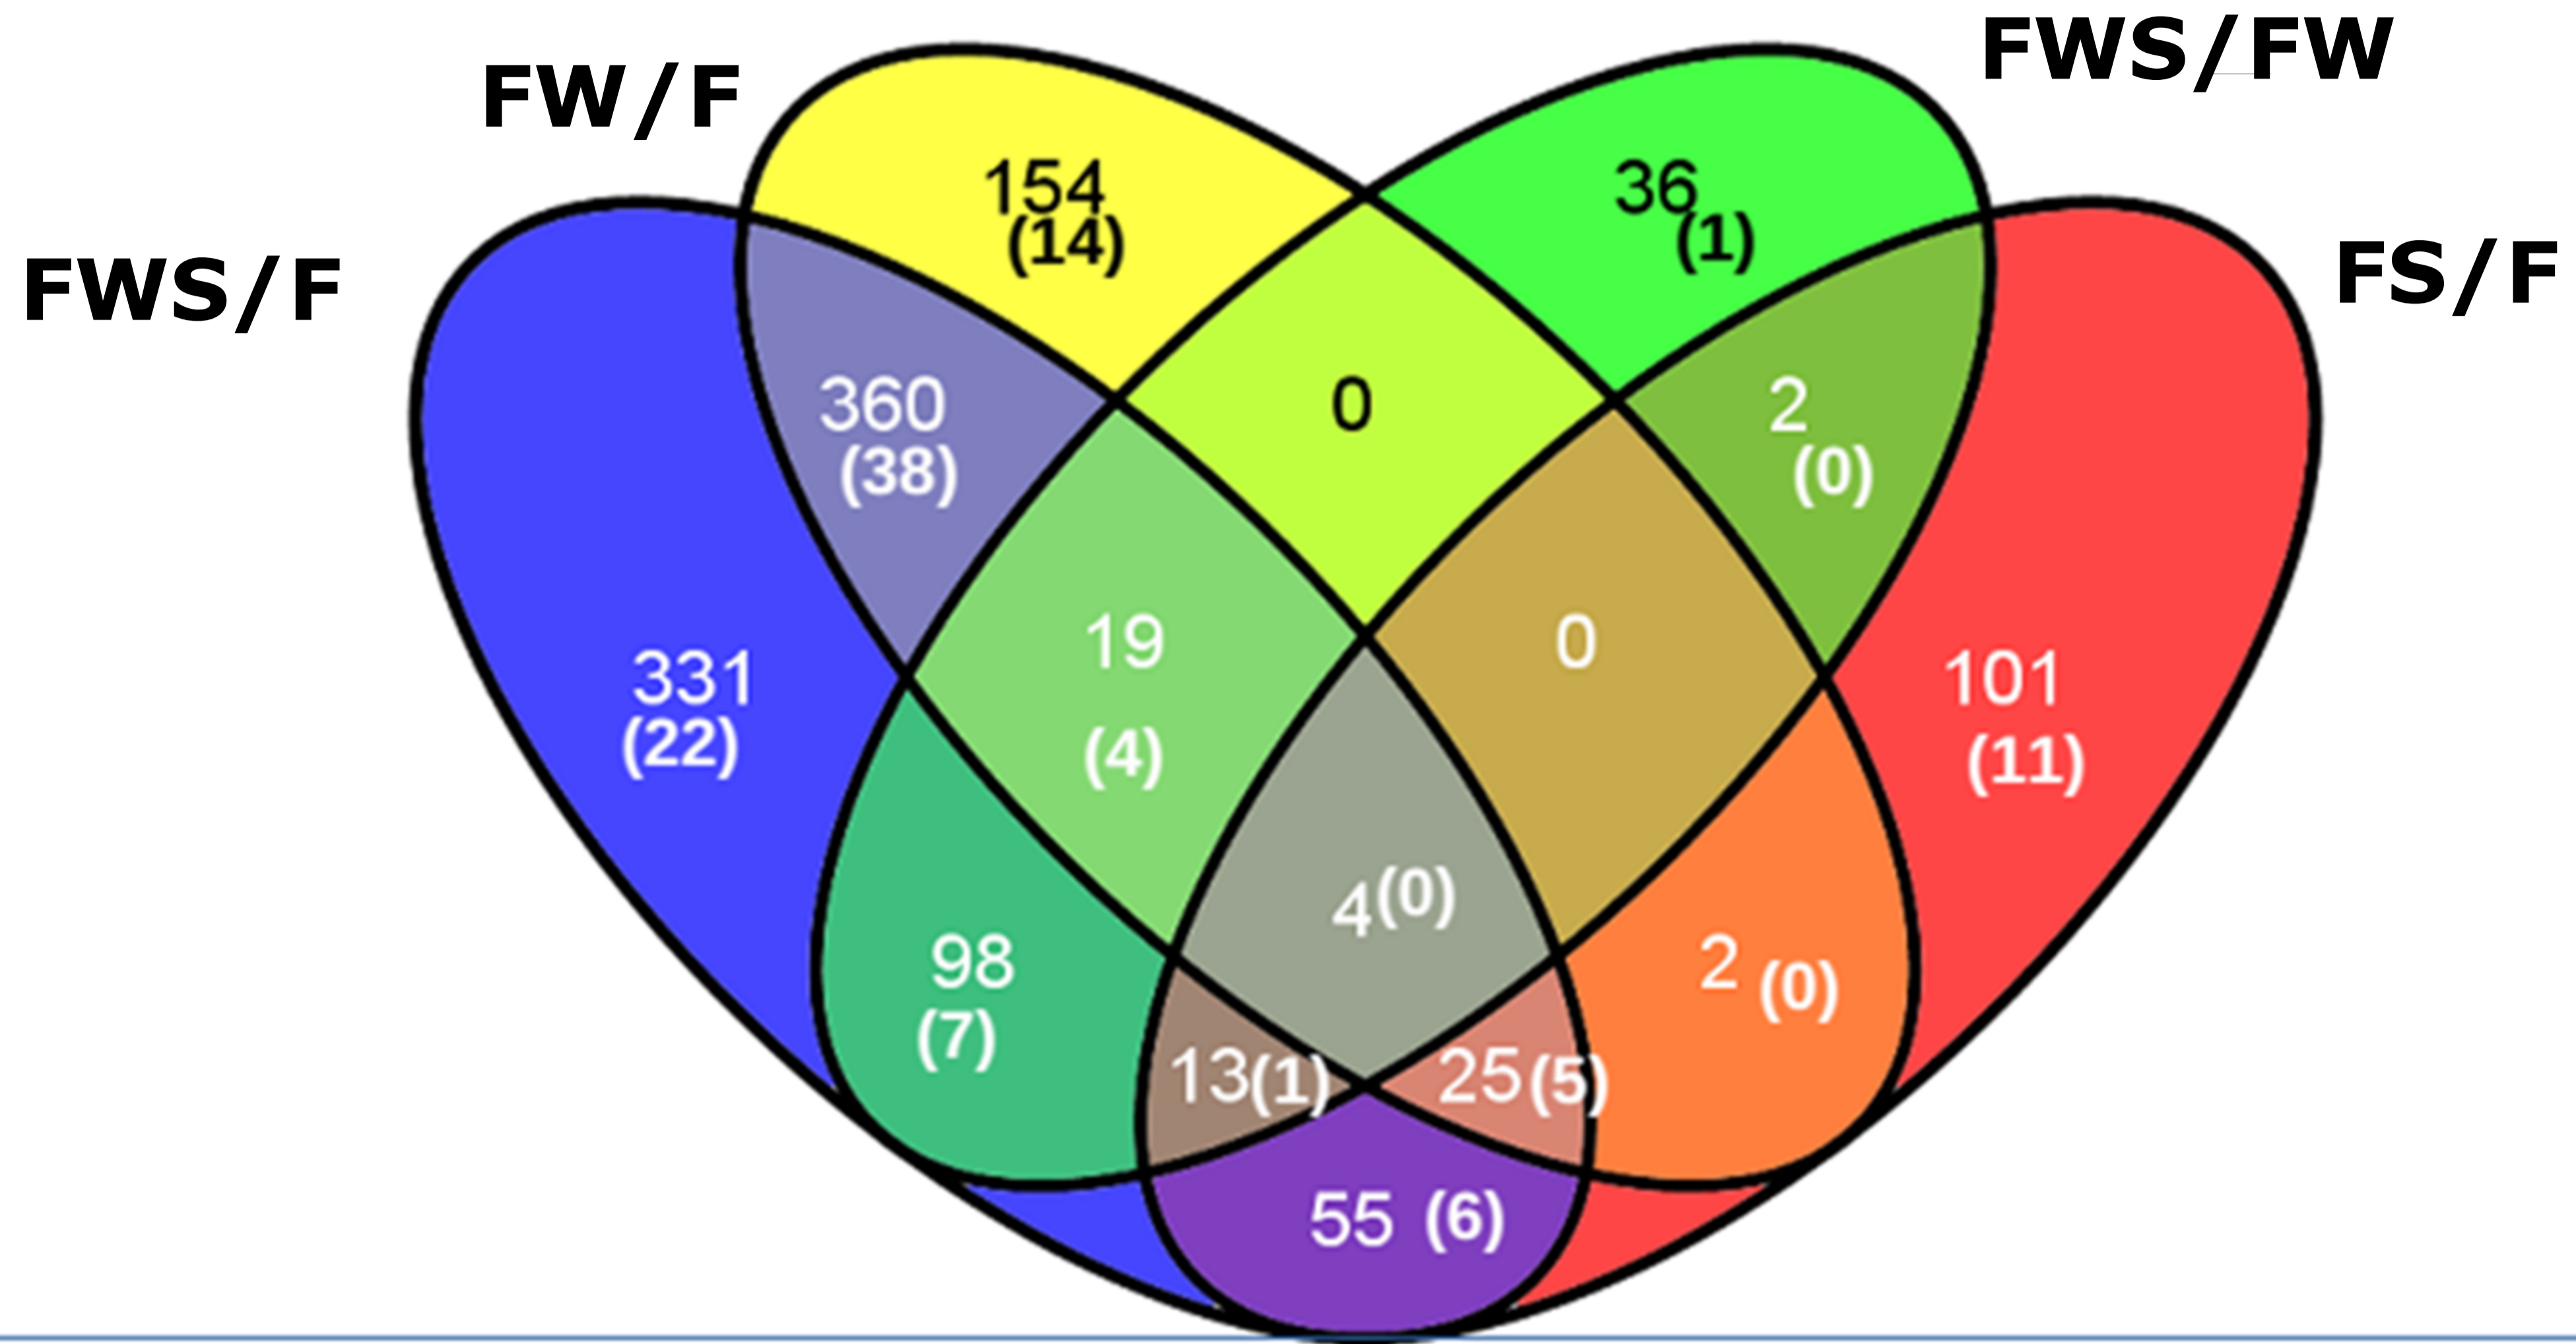

# DOWN-REGULATED

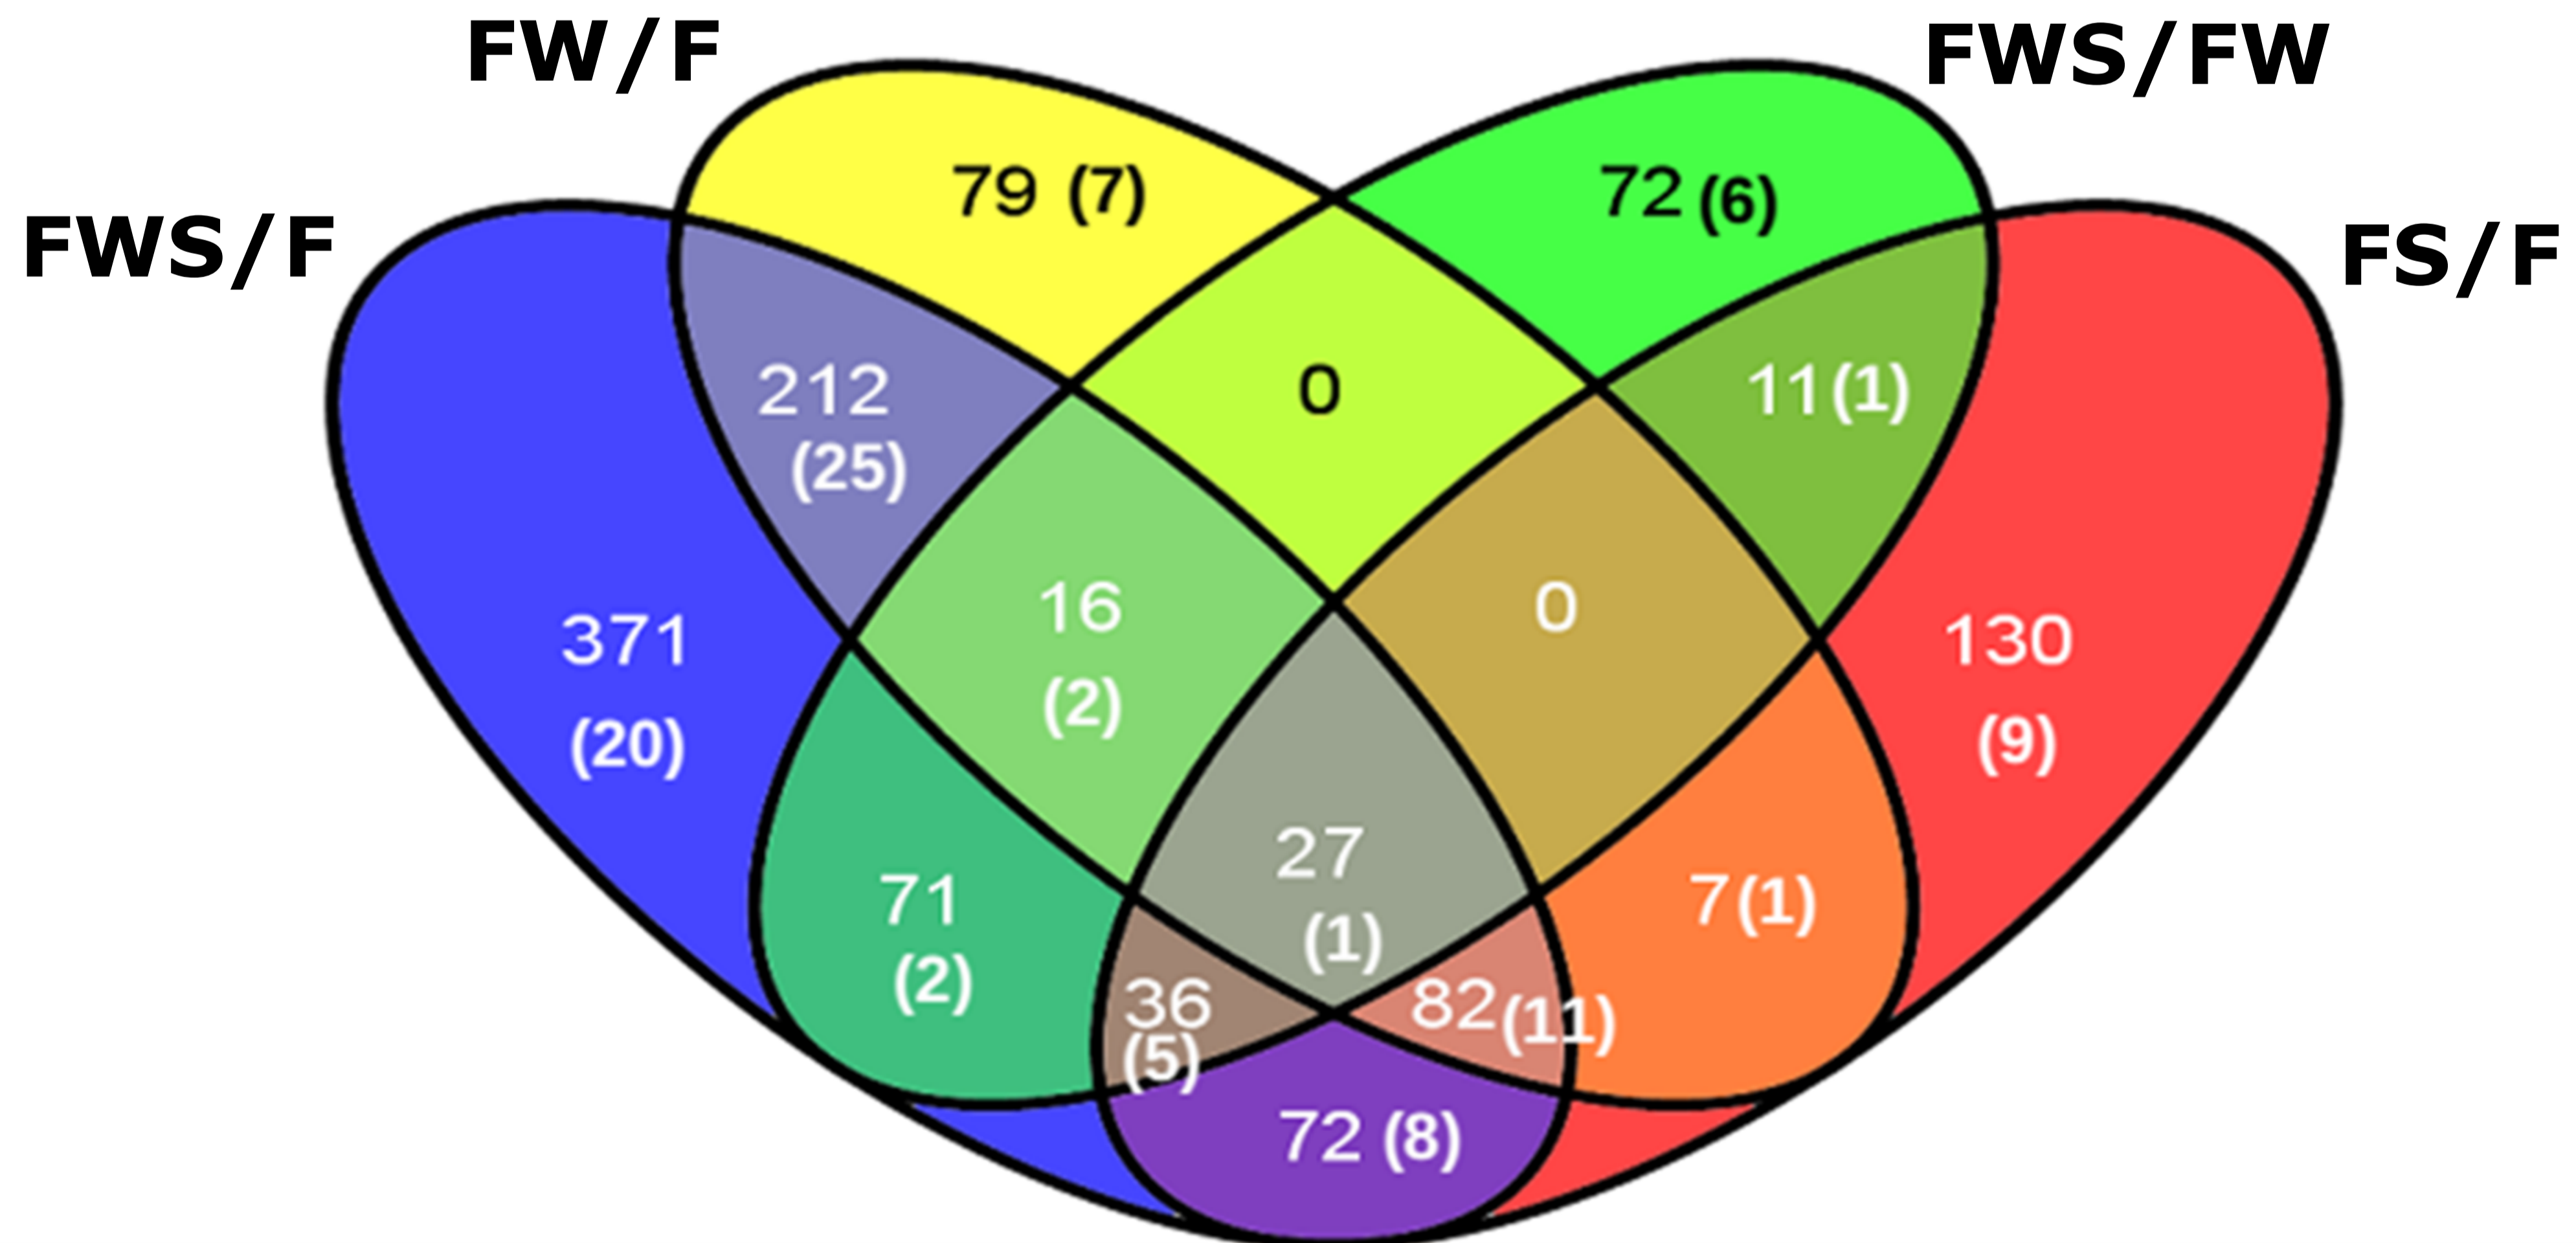

Supplement: 12864_2016_2952_MOESM11_ESM.pdf [file 12864_2016_2952_MOESM11_ESM.pdf]
